# Supplementary material for: Evaluation of Methods to Collect Diurnal Culicidae (Diptera) at Canopy and Ground Strata, in the Atlantic Forest Biome
Source: MDPI journal article supplement (doi:10.3390/insects13020202), 2022-02-16
Supplement: s1 [file s1]

**Table S1.**—Number of male specimens collected by genus and species, according to stratum (canopy and ground) and capture technique (treatment) between October 2019 and March 2020. Guarulhos, SP, Brazil.

| <b>Specie</b>                             | <b>N</b> | <b>Method</b>     | <b>Stratum</b> |
|-------------------------------------------|----------|-------------------|----------------|
| <i>Culex</i> sp                           | 2        | net               | ground         |
| <i>Haemagogus janthinomys/capricornii</i> | 1        | net               | canopy         |
| <i>Aedes aegypti</i>                      | 1        | net               | canopy         |
| <i>Trichoprosopon pallidiventer</i>       | 1        | CO <sub>2</sub> * | ground         |
| TOTAL                                     | 5        |                   |                |

\* Note: CO<sub>2</sub> = CDC-like electrical trap using carbon dioxide.
